# Supplementary material for: The mixing effect of amine and carboxyl groups on electrorheological properties and its analysis by in situ FT-IR under an electric field
Source: Royal Society of Chemistry journal article supplement (doi:10.1039/c3cp51907d), 2013-01-01
Supplement: c3cp51907d.pdf [file c3cp51907d.pdf]

**Supporting Information**

**Mixing effect of amine and carboxyl groups on  
electrorheological properties and its analysis by in situ FT-IR  
under electric field**

Young Gun Ko,<sup>a</sup> Hyun Jeong Lee,<sup>a,b</sup> Yong Sung Park,<sup>c</sup> Je Wan Woo<sup>c</sup> and Ung Su Choi<sup>\*a</sup>

<sup>a</sup> Center for Urban Energy Systems, Korea Institute of Science and Technology, Hwarangno 14-gil 5, Seongbuk-gu, Seoul 136-791, Korea. Fax: +82 2 958 5659; Tel: +82 2 958 5657; E-mail: uschoi@kist.re.kr

<sup>b</sup> Department of Chemical and Biomolecular Engineering, Sogang University, 35 Baekbeom-ro, Mapo-gu, Seoul 121-742, Korea

<sup>c</sup> Department of Industrial and Engineering Chemistry, Sangmyung University, Hongjimun 2-gil 20, Jongno-gu, Seoul 110-743, Korea

**SUPPORTING INFORMATION**

**Fig. S1-S6**

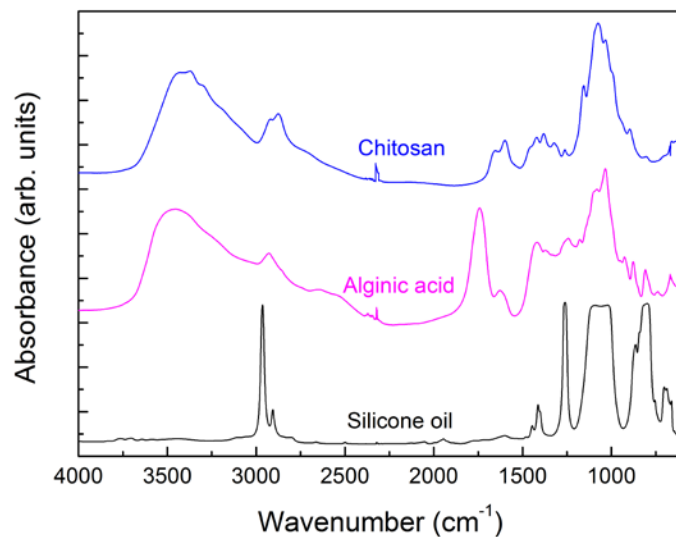

**Fig. S1** FT-IR spectra for chitosan, alginate acid, and silicone oil.

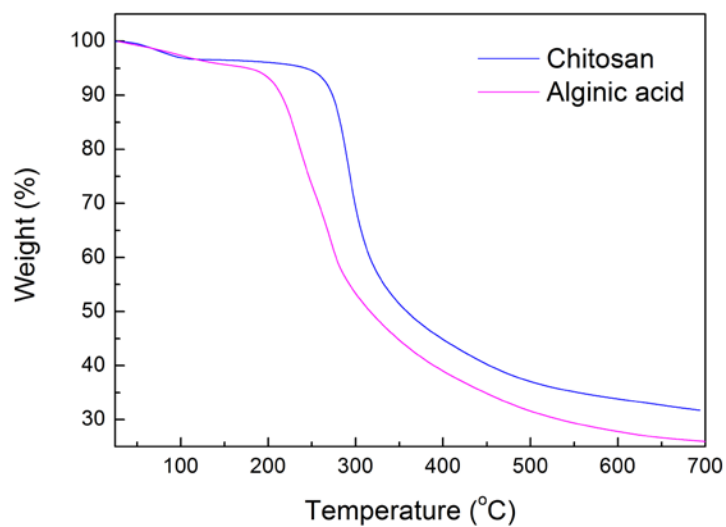

**Fig. S2** TGA curves for chitosan and alginate acid.

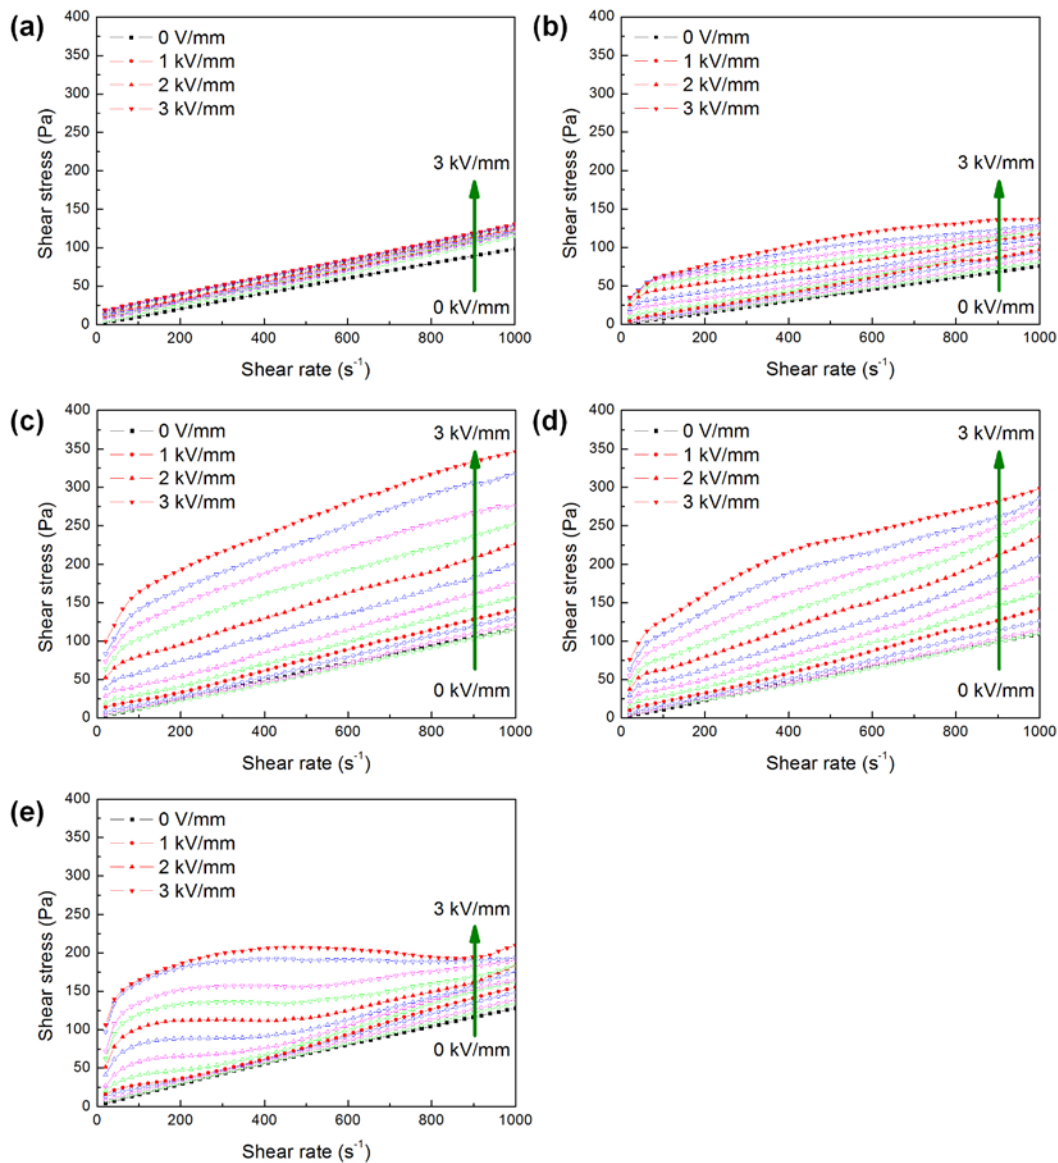

**Fig. S3** Shear stress versus shear rate for various weight compositions of chitosan/alginate dispersed suspensions at room temperature ( $25^{\circ}C$ ) with increments of  $0.25$  kV/mm; (a) 100/0, (b) 75/25, (c) 50/50, (d) 25/75, and (e) 0/100. The particle volume concentration of each ER fluid is 30 vol%.

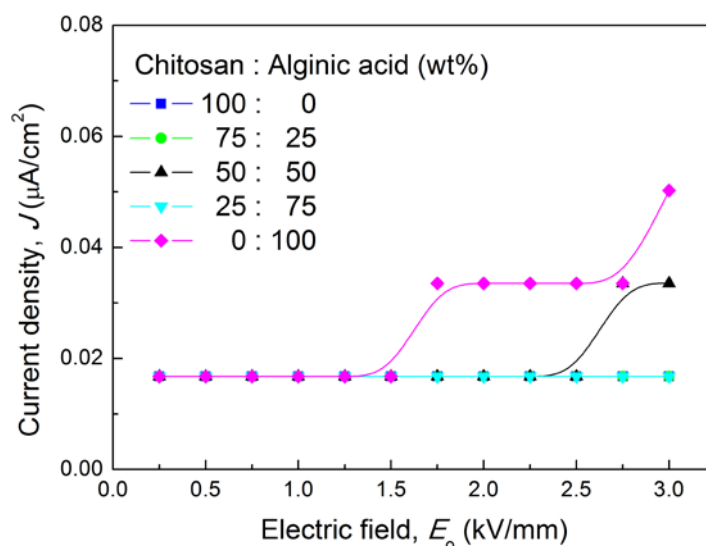

**Fig. S4** Effect of the electric fields on current density for various weight compositions of chitosan/alginate dispersed suspensions; 100/0, 75/25, 50/50, 25/75, and 0/100. The particle volume concentration of each ER fluid is 30 vol%.

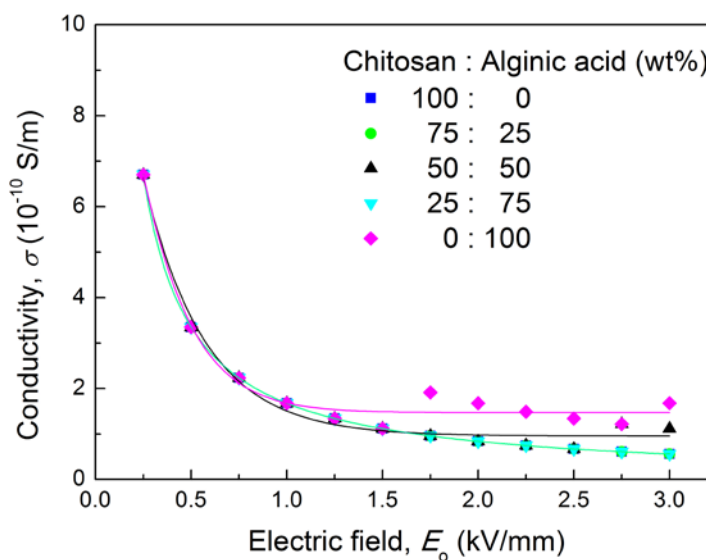

**Fig. S5** Effect of the electric fields on conductivity for various weight compositions of chitosan/alginate dispersed suspensions; 100/0, 75/25, 50/50, 25/75, and 0/100. The particle volume concentration of each ER fluid is 30 vol%.

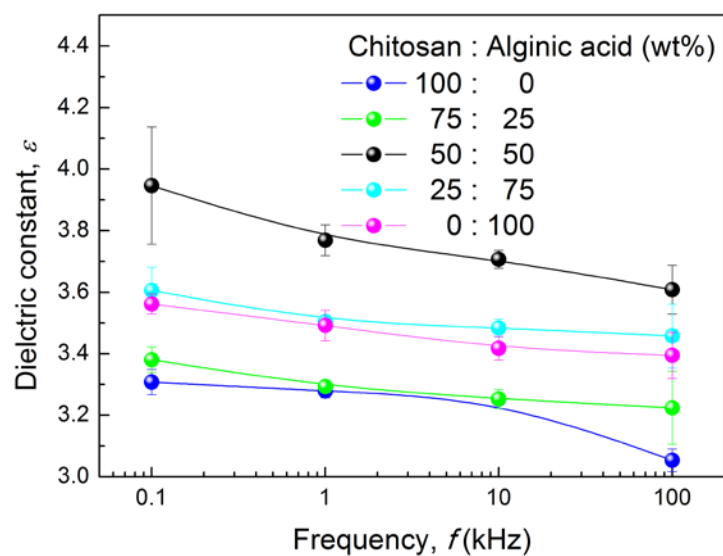

**Fig. S6** Dielectric constants for various weight compositions of chitosan/alginate acid dispersed suspensions; 100/0, 75/25, 50/50, 25/75, and 0/100. The particle volume concentration of each ER fluid is 30 vol%. Data are presented as mean  $\pm$  standard deviation,  $n = 10$ .
